# Supplementary material for: Diet controls Drosophila follicle stem cell proliferation via Hedgehog sequestration and release
Source: PubMed Central journal article supplement — J Cell Biol. 2013 May 27;201(5):741–57. doi: 10.1083/jcb.201212094 (PMC3664720; doi:10.1083/jcb.201212094), 2013-05-27
Supplement: supp_jcb.201212094_JCB_201212094_sm.pdf [file supp_jcb.201212094_JCB_201212094_sm.pdf]

Hartman et al., <http://www.jcb.org/cgi/content/full/jcb.201212094/DC1>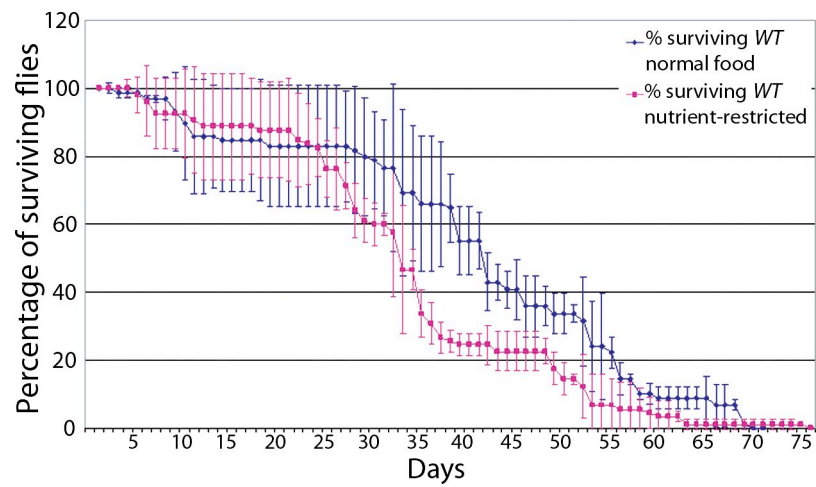

Figure S1. **WT flies survive up to 75 d on nutrient-restricted diets.** WT flies fed yeast or nutrient-restricted diets were scored daily for survival. Error bars represent standard deviations.

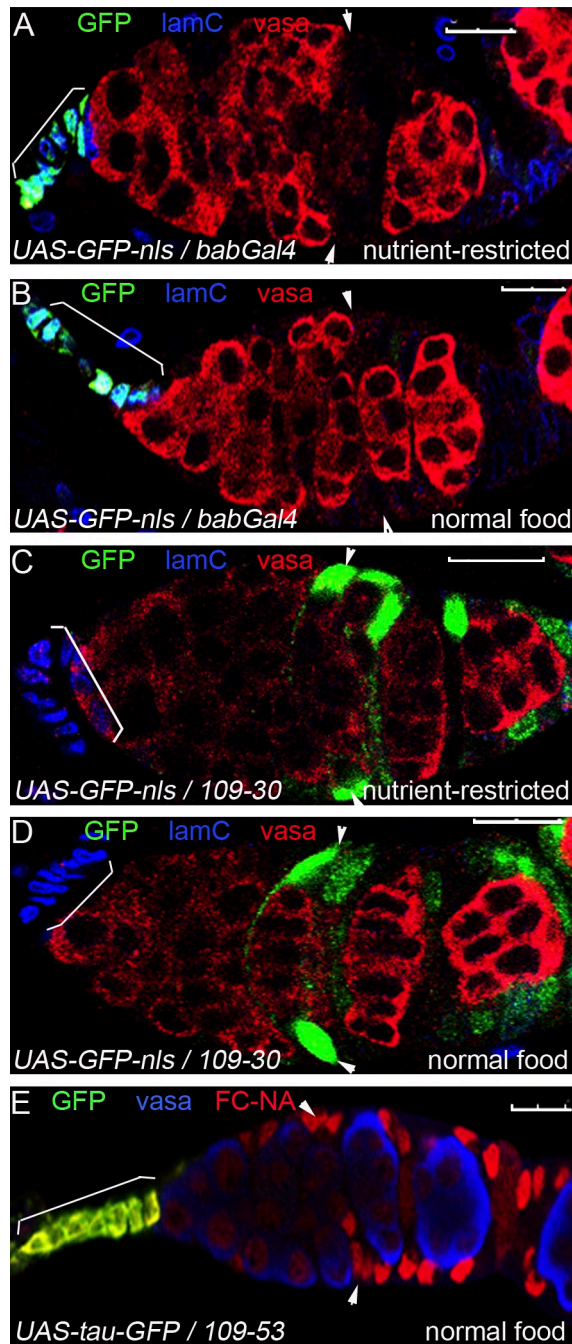

Figure S2. **Expression patterns of *Gal4* drivers in germaria.** (A–D) Flies bearing *Gal4* transgenes were crossed to flies bearing a *UAS-GFP-nls* reporter transgene. GFP indicates the expression pattern of the promoter driving *Gal4* expression. (A and B) *bab-Gal4* is expressed predominantly in apical cells in both normal food and nutrient-restricted conditions. (C and D) *109-30-Gal4* is expressed in FSCs and their daughter cells in the germarium through stage 3 in both normal food and nutrient-restricted conditions. (E) Flies bearing the *109-53-Gal4* transgene were crossed to flies bearing a *UAS-tau-GFP* reporter transgene. *109-53-Gal4* is expressed predominantly in apical cells. Arrowheads indicate FSCs. Brackets indicate apical cells. Bars, 10 μm.

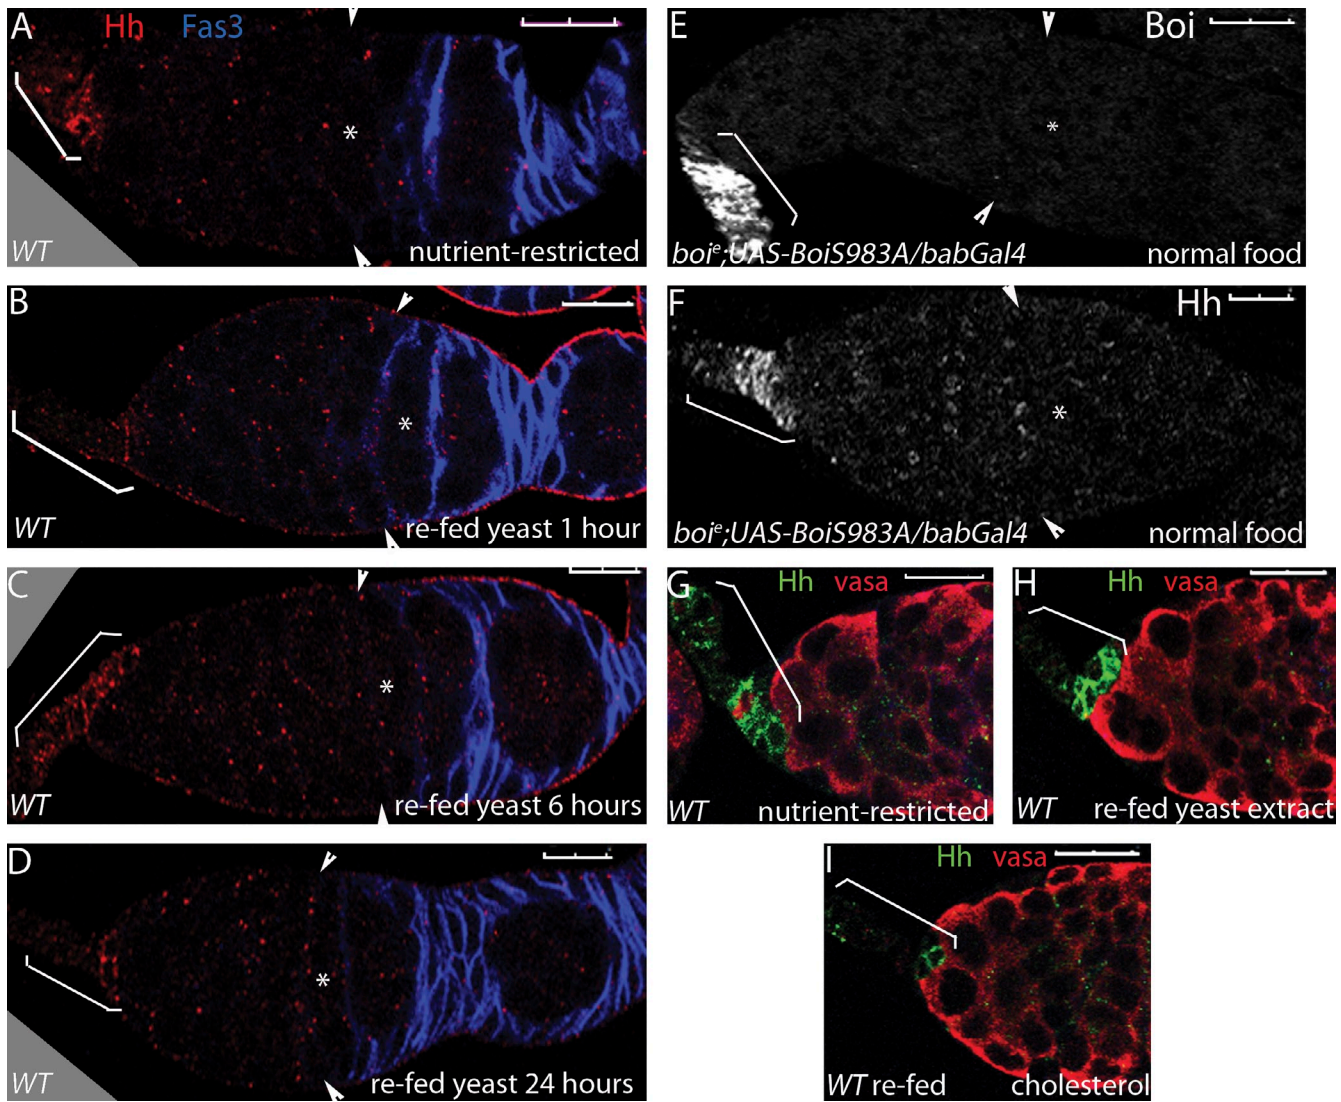

Figure S3. **Localization of endogenous Hh in nutrient-deprived and re-fed WT flies.** (A–D) Nutrient-restricted WT flies were re-fed yeast for the indicated times, and endogenous Hh localization was analyzed using an Hh antibody. Hh and follicle cells (Fas3) are shown. (E and F) Expression of *Boi*<sup>S983A</sup> in *boi*<sup>o</sup> mutant flies (*boi*<sup>o</sup>;*UAS-boi983A/babGal4*) rescues Hh sequestration in apical cells. *Boi* expression is shown in E, and Hh localization is shown in F. (G–I) Nutrient-deprived WT flies were re-fed yeast extract ± 0.2 mg/g cholesterol for 6 h, and endogenous Hh localization was analyzed using an Hh antibody. Hh and germ cells (Vasa) are shown. Asterisks indicate flattened germline cyst at the region 2A/2B border. Arrowheads indicate FSCs. Brackets indicate apical cells. The gray triangles indicate areas that were not viewed in the microscope when the image was acquired. Bars, 10 μm.

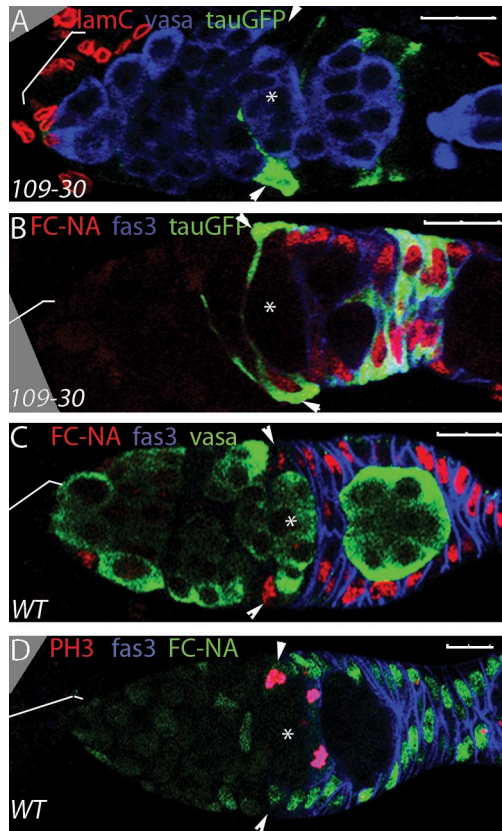

Figure S4. **FSCs can be identified by specific characteristics.** (A–D) FSCs can be identified by their position before the first flattened egg chamber (germ cells [Vasa]) in a MARCM clone (green; A), by triangular nuclear staining of FC-NA, low Fas3, and FSC position as the first marked cell in a MARCM clone (green; B) and by triangular nuclear FC-NA staining, low Fas3, and position before the first flat egg chamber (Vasa; C). (D) Dividing FSCs are identified by PH3-positive staining of the triangular shaped nucleus in a FC-NA-positive cell and low Fas3. Asterisks indicate flattened germline cyst at the region 2A/2B border. Arrowheads indicate FSCs. Brackets indicate apical cells. Bars, 10  $\mu$ M.



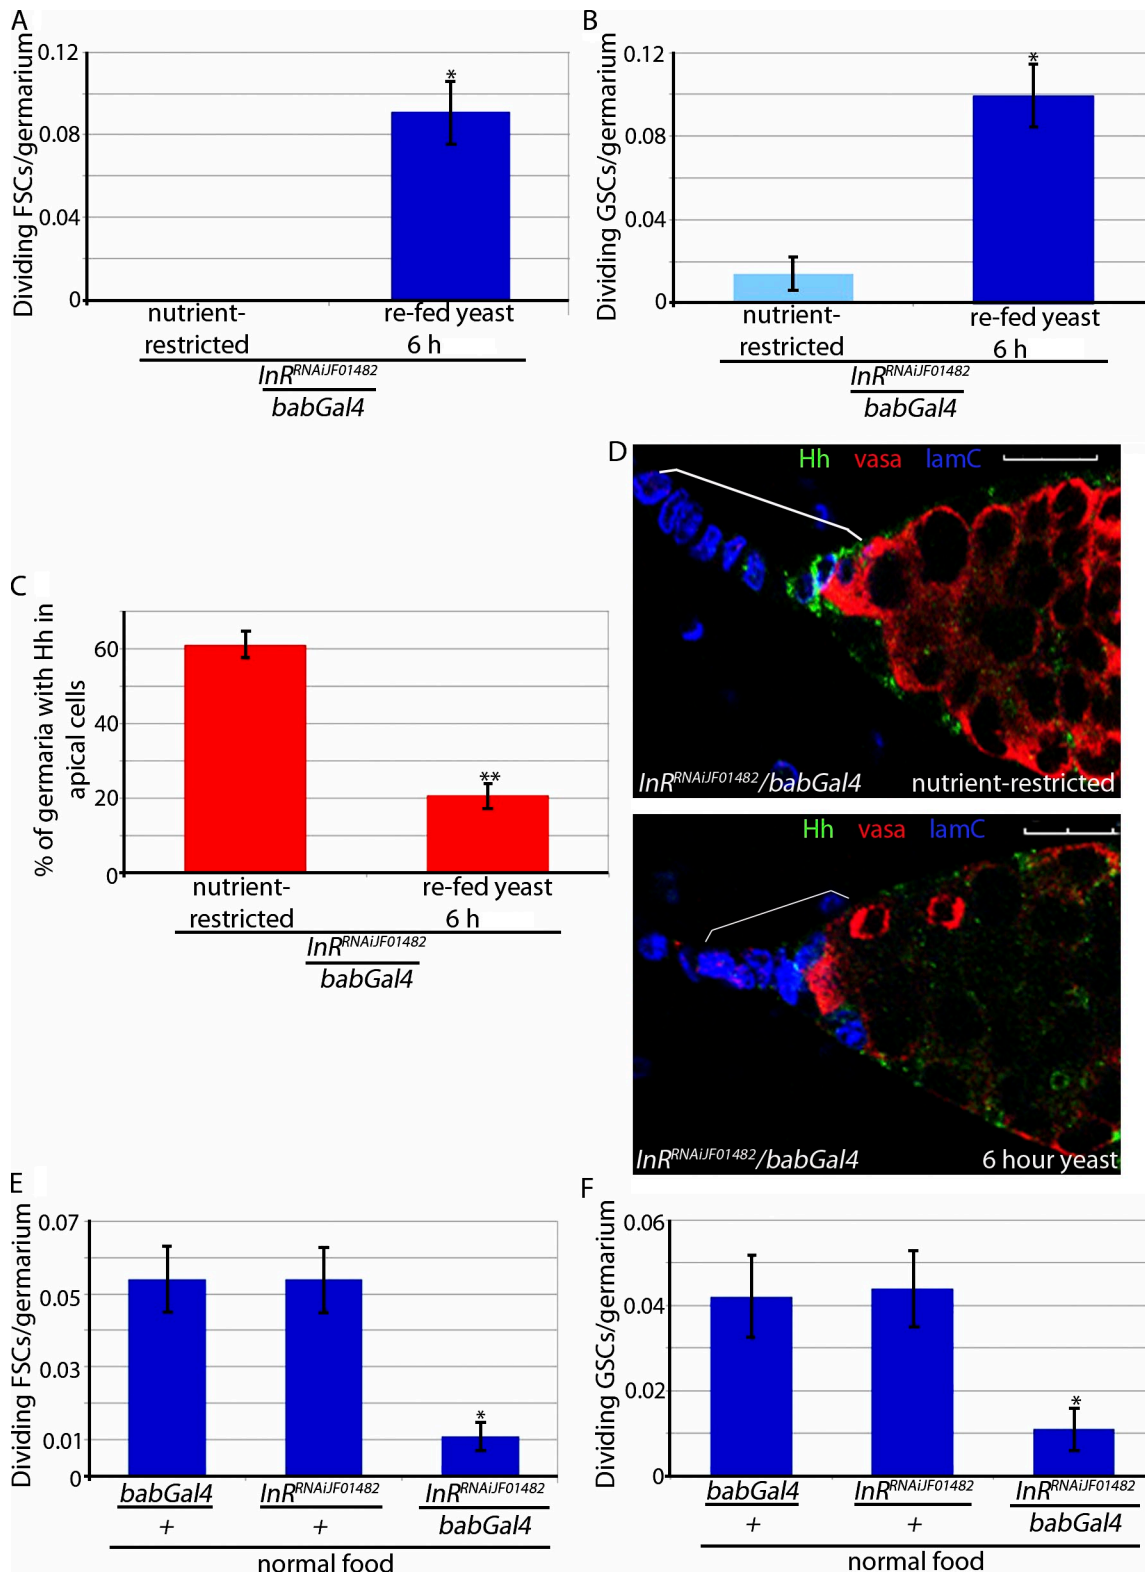

Figure S5. **Loss of InR in apical cells does not block FSC proliferation after refeeding.** (A–D) Nutrient-restricted *InR<sup>RNAiJF01482</sup>/babGal4* flies were re-fed yeast for 6 h. (A) Mean numbers of dividing FSCs (PH3+) per germarium are shown \*,  $P < 0.0002$  versus nutrient-restricted *InR<sup>RNAiJF01482</sup>/babGal4*. Error bars represent SEs ( $n = 146$  and  $364$ ; Table 1). (B) Mean numbers of dividing GSCs (PH3+) per germarium are shown. \*,  $P < 0.00001$  versus nutrient-restricted *InR<sup>RNAiJF01482</sup>/babGal4*. Error bars represent SEs ( $n = 208$  and  $412$ ). (C and D) Localization of endogenous Hh was determined. (C) The percentage of germaria with endogenous Hh localized to apical cells was scored. \*\*,  $P < 0.00001$  versus nutrient-restricted *InR<sup>RNAiJF01482</sup>/babGal4* flies ( $n = 164$  and  $155$ ). Error bars represent SEs. (D) Hh was observed in >60% of apical cells of nutrient-restricted *InR<sup>RNAiJF01482</sup>/babGal4* flies but was released from re-fed flies as observed in WT (Fig. 2). Apical cells are labeled in blue (Lamin C [lamC]), and germ cells are labeled red (Vasa). Brackets indicate apical cells. Bars, 10  $\mu$ M. (E and F) Loss of InR reduces FSC and GSC proliferation in flies on a normal food diet. (E) Mean numbers of dividing FSCs (PH3+) per germarium are shown \*,  $P < 0.00001$  versus *babGal4/+*. Error bars represent SEs ( $n = 552$ – $611$ ). (F) Mean numbers of dividing GSCs (PH3+) per germarium are shown. \*,  $P < 0.002$  versus *babGal4/+*. Error bars represent SEs ( $n = 426$ – $527$ ).
